# Supplementary material
Source: ML conference proceedings conference paper supplement (https://openaccess.thecvf.com/content/ICCV2023/html/Tu_ImGeoNet_Image-induced_Geometry-aware_ICCV_2023_paper.html)
Supplement: Supplementary file 1 [file Tu_ImGeoNet_Image-induced_Geometry-aware_ICCV_2023_supplemental.pdf]

# Supplementary Material for ImGeoNet: Image-induced Geometry-aware Voxel Representation for Multi-view 3D Object Detection

## A. Further Experiment

### A.1. Object Sizes in ScanNet200

Table 1. Mean object sizes ( $\text{m}^3$ ) across different groups in ScanNet200, which are determined from the training data.

|             | ScanNet200 |        |      |
|-------------|------------|--------|------|
|             | Head       | Common | Tail |
| Object size | 0.92       | 0.14   | 0.03 |

We report the mean object sizes of different category groups within ScanNet200 [2]. The results presented in Table. 1 suggest that objects within the common and tail groups tend to have smaller sizes when compared to those within the head group.

### A.2. Visualization

This study presents the qualitative results of 3D object detection on three distinct datasets, namely ARKitScenes (as depicted in Fig. 1 and Fig. 2), ScanNetV2 (as illustrated in Fig. 3), and ScanNet200 (as shown in Fig. 4). The effectiveness of our proposed geometry-aware representation can be verified by ImGeoNet’s superior outcomes, in comparison to ImVoxelNet [3], across all datasets. Additionally, ImGeoNet generates more precise results than the seminal point cloud-based approach, VoteNet [1], in practical scenarios that involve sparse and noisy point clouds or diverse object classes.

### A.3. Per-class Evaluation

We present the 3D object detection scores per class across different datasets. The outcomes obtained from ARKitScenes are provided in Table. 2. Similarly, the outcomes obtained from ScanNetV2 are presented in Table. 3. Finally, the results for ScanNet200 are provided separately for three category groups: head, common, and tail. They are presented in Table. 4, Table. 5, and Table. 6, respectively.

## References

- [1] Charles R Qi, Or Litany, Kaiming He, and Leonidas J Guibas. Deep hough voting for 3d object detection in point clouds. In *ICCV*, 2019. 1
- [2] David Rozenberszki, Or Litany, and Angela Dai. Language-grounded indoor 3d semantic segmentation in the wild. In *ECCV*, 2022. 1
- [3] Danila Rukhovich, Anna Vorontsova, and Anton Konushin. Imvoxelnet: Image to voxels projection for monocular and multi-view general-purpose 3d object detection. In *Proceedings of the IEEE/CVF Winter Conference on Applications of Computer Vision*, 2022. 1

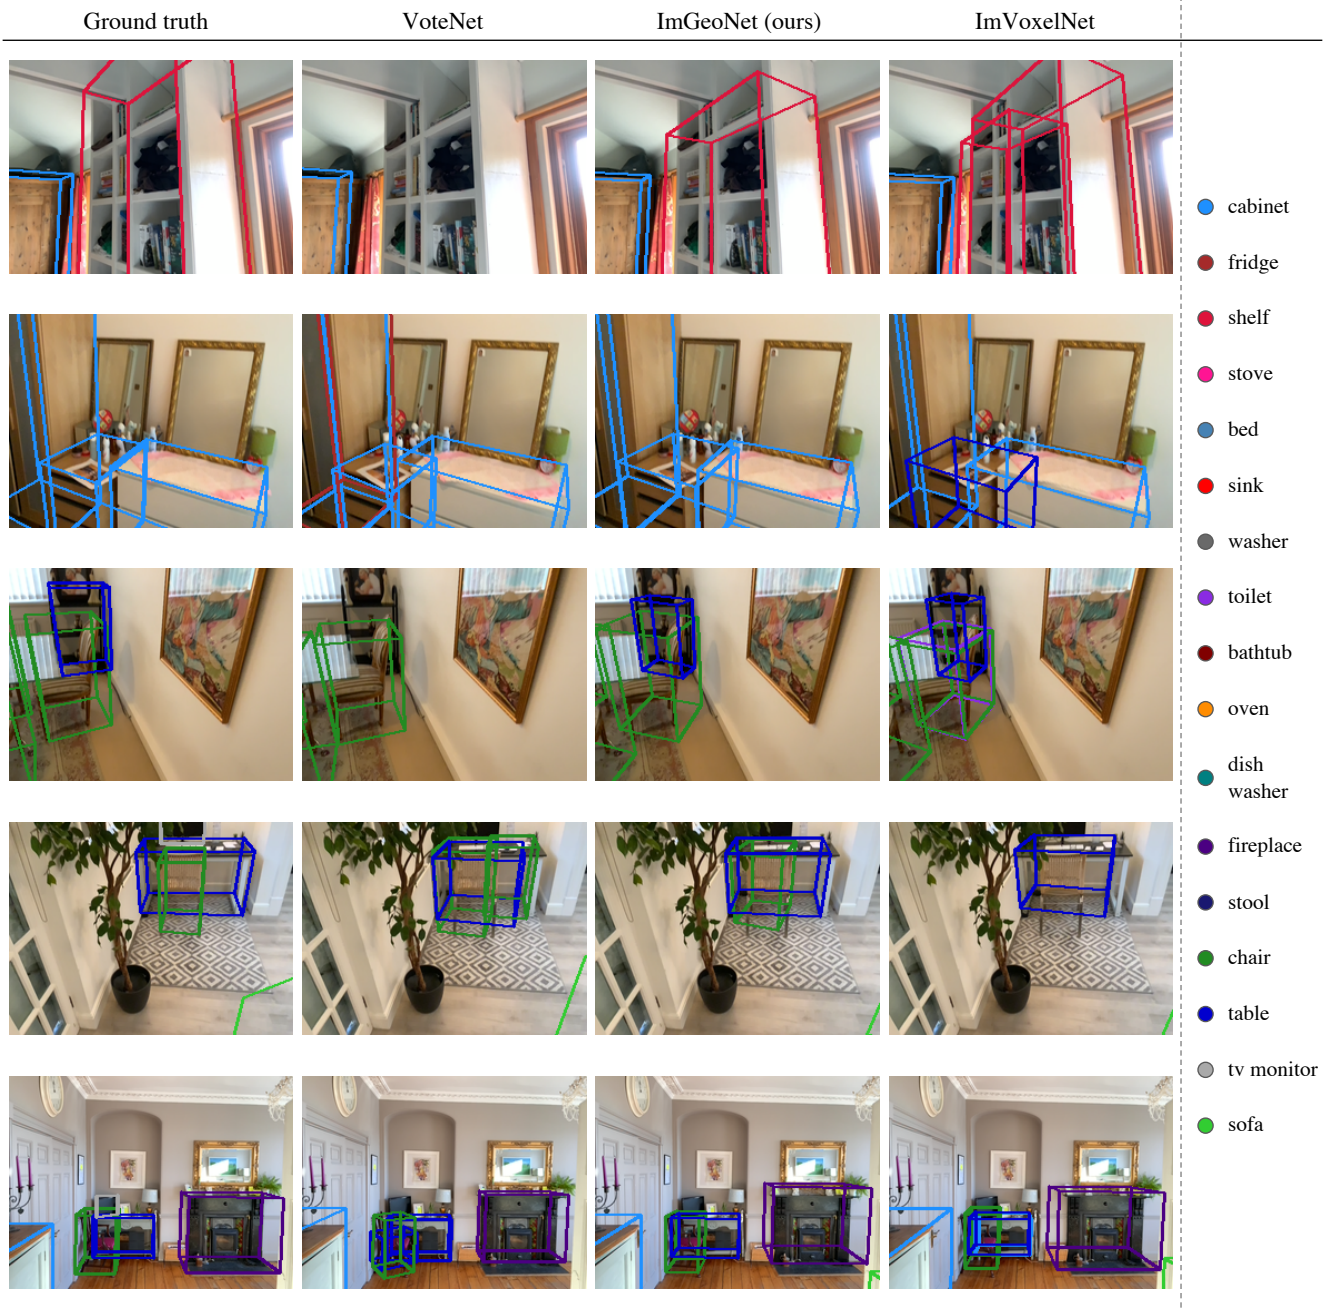

Figure 1. Qualitative results on ARKitScenes.

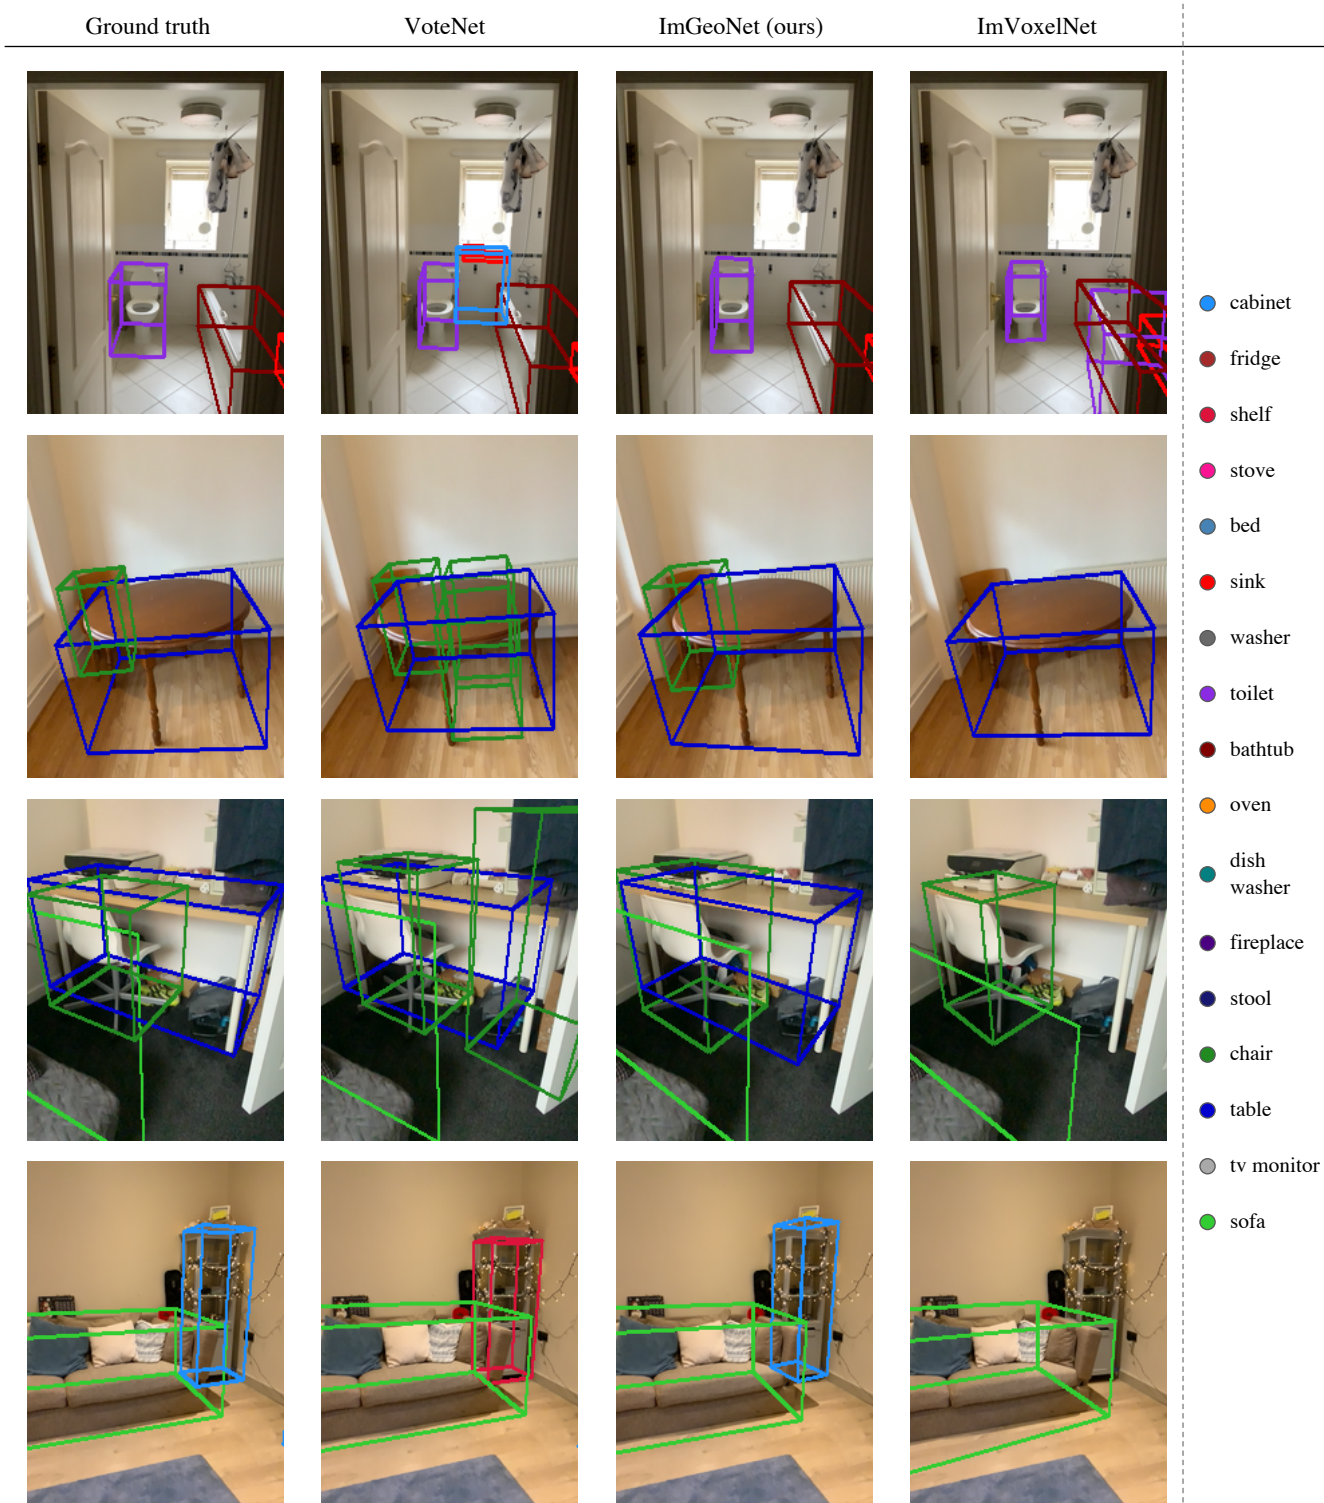

Figure 2. More qualitative results on ARKitScenes.

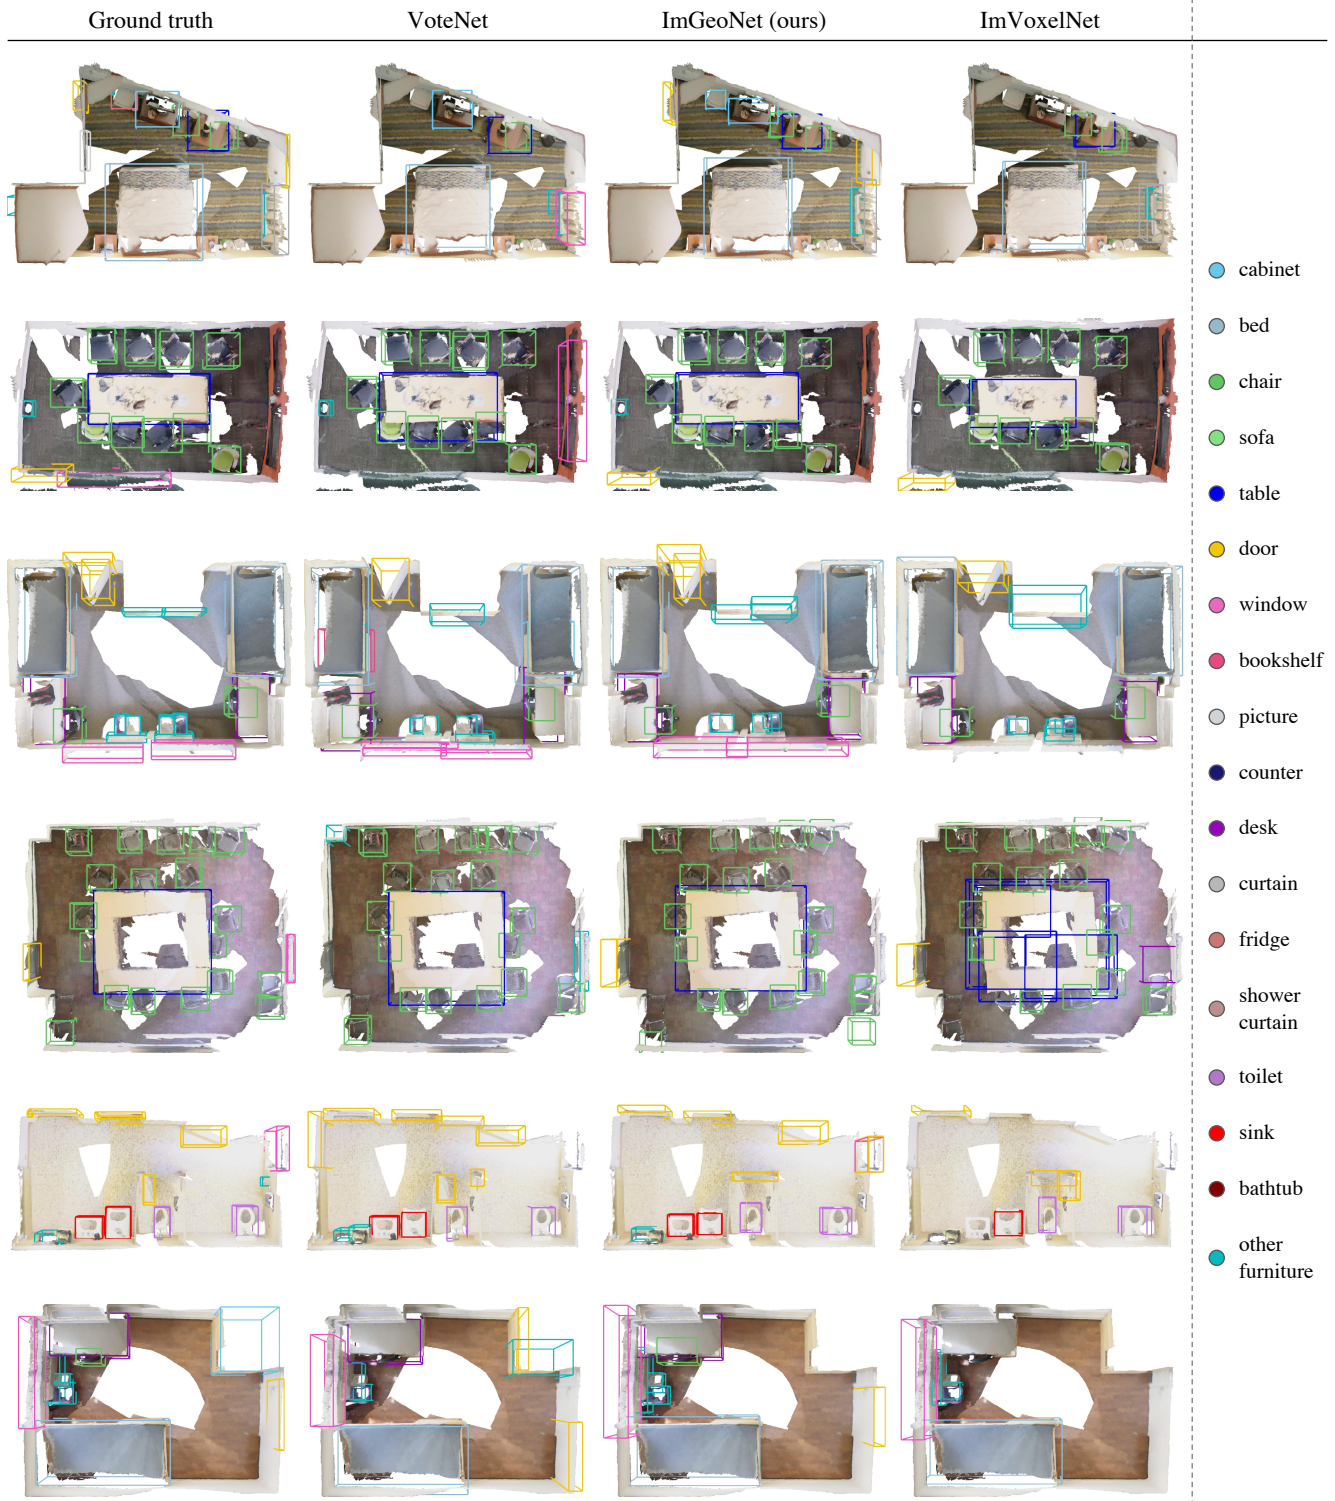

Figure 3. Qualitative results on ScanNetV2.

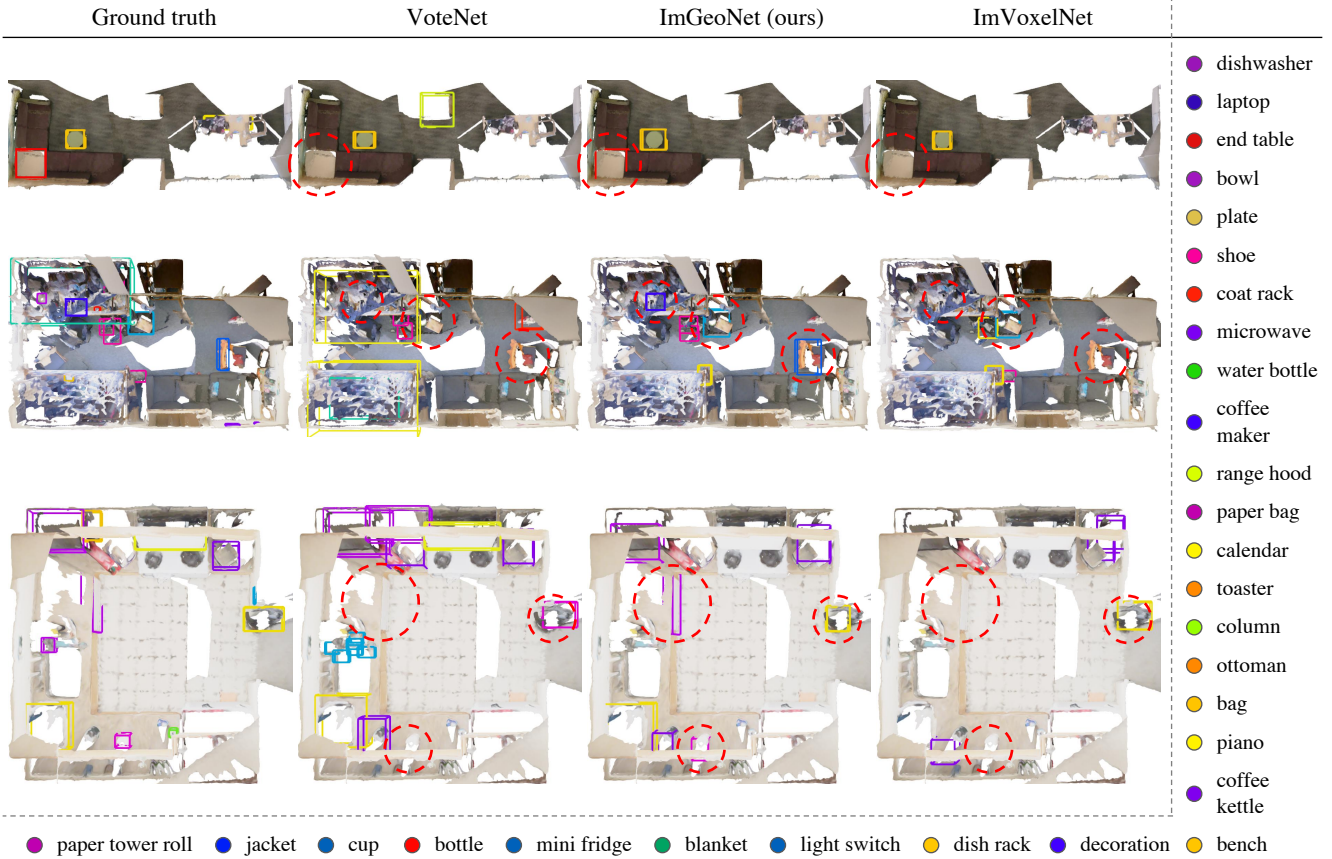

Figure 4. Qualitative results on ScanNet200. Only the common and tail category groups are presented.

Table 2. 3D object detection scores per class on ARKitScenes.

|                 | cab  | refrig | shelf | stove | bed  | sink | washr | toil | bath | oven | dwashr | firepl | stool | chair | tabl | tvmnt | sofa | mAP@0.25    |
|-----------------|------|--------|-------|-------|------|------|-------|------|------|------|--------|--------|-------|-------|------|-------|------|-------------|
| ImGeoNet (ours) | 55.8 | 82.6   | 48.4  | 20.4  | 89.3 | 52.8 | 80.0  | 92.5 | 94.7 | 66.0 | 18.1   | 68.8   | 30.6  | 72.3  | 70.3 | 2.2   | 79.0 | <b>60.2</b> |
| ImVoxelNet      | 53.1 | 82.3   | 42.4  | 13.5  | 87.5 | 50.4 | 77.4  | 92.3 | 94.6 | 64.1 | 28.6   | 55.1   | 25.1  | 72.9  | 66.8 | 2.0   | 77.7 | 58.0        |
| VoteNet         | 62.1 | 79.6   | 26.0  | 4.9   | 92.9 | 43.5 | 56.5  | 91.9 | 94.1 | 37.4 | 6.4    | 67.8   | 18.6  | 57.4  | 62.8 | 21.6  | 83.2 | 53.3        |

  

|                 | cab  | refrig | shelf | stove | bed  | sink | washr | toil | bath | oven | dwashr | firepl | stool | chair | tabl | tvmnt | sofa | mAP@0.5     |
|-----------------|------|--------|-------|-------|------|------|-------|------|------|------|--------|--------|-------|-------|------|-------|------|-------------|
| ImGeoNet (ours) | 31.8 | 72.5   | 21.7  | 3.9   | 83.3 | 19.9 | 71.2  | 84.8 | 91.0 | 44.4 | 15.9   | 23.1   | 13.3  | 49.3  | 45.1 | 0.1   | 67.2 | <b>43.4</b> |
| ImVoxelNet      | 25.2 | 68.8   | 11.3  | 3.9   | 75.9 | 10.9 | 61.2  | 82.5 | 89.6 | 38.3 | 24.7   | 13.4   | 11.0  | 42.3  | 36.0 | 0.0   | 64.2 | 38.8        |
| VoteNet         | 37.3 | 75.5   | 15.2  | 0.5   | 89.7 | 20.7 | 50.3  | 70.6 | 93.7 | 15.4 | 2.8    | 28.7   | 10.4  | 30.3  | 40.2 | 1.3   | 71.7 | 38.5        |

Table 3. 3D object detection scores per class on ScanNetV2.

|                 | cab  | bed  | chair | sofa | tabl | door | wind | bkshf | pic | cntr | desk | curt | fridg | showr | toil | sink | bath | ofurn | mAP@0.25    |
|-----------------|------|------|-------|------|------|------|------|-------|-----|------|------|------|-------|-------|------|------|------|-------|-------------|
| ImGeoNet (ours) | 38.7 | 86.5 | 76.6  | 75.7 | 59.3 | 42.0 | 28.1 | 59.2  | 4.3 | 42.8 | 71.5 | 36.9 | 51.8  | 44.1  | 95.2 | 58.0 | 79.6 | 36.8  | <b>54.8</b> |
| ImVoxelNet      | 34.4 | 81.9 | 74.6  | 71.9 | 55.1 | 32.0 | 16.9 | 38.2  | 2.0 | 37.0 | 62.2 | 26.5 | 54.1  | 39.0  | 90.7 | 52.1 | 74.9 | 32.8  | 48.7        |
| VoteNet         | 36.3 | 87.9 | 88.7  | 89.6 | 58.8 | 47.3 | 38.1 | 44.6  | 7.8 | 56.1 | 71.7 | 47.2 | 45.4  | 57.1  | 94.9 | 54.7 | 92.1 | 37.2  | 58.7        |

  

|                 | cab  | bed  | chair | sofa | tabl | door | wind | bkshf | pic | cntr | desk | curt | fridg | showr | toil | sink | bath | ofurn | mAP@0.5     |
|-----------------|------|------|-------|------|------|------|------|-------|-----|------|------|------|-------|-------|------|------|------|-------|-------------|
| ImGeoNet (ours) | 14.3 | 74.2 | 47.4  | 46.9 | 41.0 | 8.1  | 2.0  | 26.9  | 0.5 | 6.6  | 44.7 | 4.4  | 28.2  | 3.9   | 71.0 | 25.9 | 48.3 | 17.2  | <b>28.4</b> |
| ImVoxelNet      | 11.0 | 69.3 | 42.3  | 30.1 | 32.2 | 4.8  | 0.9  | 11.3  | 0.2 | 2.7  | 39.2 | 4.0  | 23.1  | 3.2   | 67.5 | 20.3 | 55.5 | 10.9  | 23.8        |
| VoteNet         | 8.1  | 76.1 | 67.2  | 68.8 | 42.4 | 15.3 | 6.4  | 28.0  | 1.3 | 9.5  | 37.5 | 11.6 | 27.8  | 10.0  | 86.5 | 16.8 | 78.9 | 11.7  | 33.5        |

Table 4. 3D object detection scores per class on ScanNet200’s **head** group (IoU threshold = 0.25).

|                 |               |                 |             |                 |            |                 |               |                 |
|-----------------|---------------|-----------------|-------------|-----------------|------------|-----------------|---------------|-----------------|
|                 | wall          | chair           | floor       | table           | door       | couch           | cabinet       | shelf           |
| ImGeoNet (ours) | 28.4          | 65.9            | 41.7        | 42.0            | 42.0       | 67.6            | 22.5          | 25.9            |
| ImVoxelNet      | 18.9          | 64.0            | 43.5        | 39.0            | 31.1       | 69.4            | 21.8          | 19.9            |
| VoteNet         | 46.5          | 79.0            | 96.6        | 50.3            | 53.9       | 89.5            | 34.1          | 35.7            |
|                 | desk          | office chair    | bed         | pillow          | sink       | picture         | window        | toilet          |
| ImGeoNet (ours) | 70.5          | 24.0            | 96.0        | 61.5            | 61.9       | 10.9            | 25.2          | 92.9            |
| ImVoxelNet      | 64.4          | 20.7            | 91.5        | 45.4            | 56.2       | 4.2             | 12.8          | 93.0            |
| VoteNet         | 71.9          | 26.8            | 93.2        | 27.2            | 47.2       | 6.1             | 34.0          | 96.7            |
|                 | bookshelf     | monitor         | curtain     | book            | armchair   | coffee table    | box           | refrigerator    |
| ImGeoNet (ours) | 52.2          | 68.0            | 30.6        | 33.7            | 57.7       | 74.3            | 24.9          | 49.5            |
| ImVoxelNet      | 53.6          | 58.1            | 20.8        | 21.9            | 54.8       | 69.5            | 18.7          | 52.7            |
| VoteNet         | 34.2          | 56.3            | 35.5        | 6.8             | 51.1       | 78.4            | 5.2           | 63.5            |
|                 | lamp          | kitchen cabinet | towel       | clothes         | tv         | nightstand      | counter       | dresser         |
| ImGeoNet (ours) | 41.2          | 24.4            | 19.5        | 11.7            | 57.5       | 76.5            | 24.0          | 41.5            |
| ImVoxelNet      | 35.3          | 23.3            | 11.8        | 5.5             | 43.3       | 71.0            | 9.2           | 44.3            |
| VoteNet         | 34.1          | 33.8            | 15.1        | 9.0             | 49.2       | 71.1            | 24.8          | 22.5            |
|                 | stool         | plant           | ceiling     | bathtub         | backpack   | tv stand        | whiteboard    | shower curtain  |
| ImGeoNet (ours) | 15.2          | 45.5            | 0.0         | 71.2            | 62.9       | 52.3            | 27.9          | 38.3            |
| ImVoxelNet      | 13.6          | 29.3            | 0.0         | 77.0            | 62.2       | 48.1            | 14.1          | 32.0            |
| VoteNet         | 21.9          | 22.7            | 36.1        | 86.8            | 32.6       | 35.0            | 24.2          | 63.2            |
|                 | trash can     | closet          | stairs      | stove           | board      | washing machine | mirror        | copier          |
| ImGeoNet (ours) | 59.4          | 10.1            | 43.3        | 70.6            | 5.1        | 48.8            | 12.4          | 79.8            |
| ImVoxelNet      | 53.2          | 7.8             | 32.8        | 64.4            | 1.8        | 56.7            | 6.3           | 72.2            |
| VoteNet         | 41.7          | 3.9             | 15.1        | 75.7            | 4.2        | 48.5            | 14.3          | 91.7            |
|                 | sofa chair    | file cabinet    | shower      | blinds          | blackboard | radiator        | recycling bin | wardrobe        |
| ImGeoNet (ours) | 2.6           | 39.7            | 6.3         | 0.0             | 45.4       | 33.0            | 60.3          | 12.6            |
| ImVoxelNet      | 5.7           | 33.8            | 16.8        | 0.0             | 44.4       | 25.8            | 51.4          | 9.4             |
| VoteNet         | 10.1          | 16.1            | 26.9        | 1.4             | 51.1       | 37.8            | 7.3           | 38.4            |
|                 | clothes dryer | bathroom stall  | shower wall | kitchen counter | doorframe  | mailbox         | object        | bathroom vanity |
| ImGeoNet (ours) | 0.0           | 47.0            | 56.8        | 31.8            | 18.2       | 7.0             | 1.2           | 44.3            |
| ImVoxelNet      | 0.0           | 48.2            | 58.1        | 24.6            | 16.6       | 4.2             | 0.5           | 41.7            |
| VoteNet         | 0.4           | 43.5            | 60.1        | 20.6            | 30.1       | 12.5            | 0.3           | 57.4            |
|                 | closet wall   | stair rail      | <b>mAP</b>  |                 |            |                 |               |                 |
| ImGeoNet (ours) | 0.1           | 1.1             | <b>38.1</b> |                 |            |                 |               |                 |
| ImVoxelNet      | 4.5           | 1.9             | 34.1        |                 |            |                 |               |                 |
| VoteNet         | 17.2          | 10.9            | 38.5        |                 |            |                 |               |                 |

Table 5. 3D object detection scores per class on ScanNet200’s **common** group (IoU threshold = 0.25).

|                 |              |                  |                |                     |               |                       |                  |
|-----------------|--------------|------------------|----------------|---------------------|---------------|-----------------------|------------------|
|                 | cushion      | end table        | dining table   | keyboard            | bag           | toilet paper          | printer          |
| ImGeoNet (ours) | 0.0          | 19.9             | 7.8            | 18.4                | 12.8          | 17.7                  | 41.7             |
| ImVoxelNet      | 0.0          | 17.8             | 3.3            | 5.5                 | 10.4          | 12.1                  | 29.4             |
| VoteNet         | 0.1          | 17.2             | 5.7            | 0.4                 | 2.7           | 2.1                   | 29.6             |
|                 | blanket      | microwave        | shoe           | computer tower      | bottle        | bin                   | ottoman          |
| ImGeoNet (ours) | 19.3         | 51.5             | 36.3           | 21.3                | 1.1           | 0.5                   | 51.2             |
| ImVoxelNet      | 6.5          | 31.5             | 27.0           | 17.8                | 2.3           | 0.2                   | 54.6             |
| VoteNet         | 0.7          | 23.4             | 4.6            | 45.0                | 0.3           | 1.7                   | 56.6             |
|                 | bench        | basket           | fan            | laptop              | person        | paper towel dispenser | oven             |
| ImGeoNet (ours) | 8.5          | 5.3              | 12.3           | 76.0                | 8.7           | 72.2                  | 17.7             |
| ImVoxelNet      | 8.0          | 13.3             | 7.4            | 62.4                | 9.9           | 81.6                  | 6.6              |
| VoteNet         | 21.2         | 0.1              | 3.0            | 0.4                 | 14.5          | 63.3                  | 0.8              |
|                 | rack         | piano            | suitcase       | rail                | container     | telephone             | stand            |
| ImGeoNet (ours) | 0.0          | 30.6             | 48.2           | 0.4                 | 2.1           | 24.4                  | 0.0              |
| ImVoxelNet      | 0.0          | 13.8             | 43.3           | 0.1                 | 1.3           | 21.8                  | 0.0              |
| VoteNet         | 0.0          | 33.9             | 49.2           | 2.0                 | 0.5           | 1.5                   | 0.0              |
|                 | light        | laundry basket   | pipe           | seat                | column        | ladder                | jacket           |
| ImGeoNet (ours) | 0.0          | 3.7              | 0.1            | 0.0                 | 0.0           | 5.0                   | 17.7             |
| ImVoxelNet      | 0.0          | 4.8              | 0.0            | 0.0                 | 0.0           | 14.0                  | 14.6             |
| VoteNet         | 1.7          | 1.1              | 0.0            | 1.4                 | 30.9          | 1.1                   | 0.2              |
|                 | storage bin  | coffee maker     | dishwasher     | machine             | mat           | window sill           | bulletin board   |
| ImGeoNet (ours) | 9.4          | 56.8             | 48.1           | 0.0                 | 19.6          | 3.9                   | 19.9             |
| ImVoxelNet      | 5.5          | 26.5             | 27.9           | 0.0                 | 9.8           | 0.3                   | 11.8             |
| VoteNet         | 0.9          | 12.9             | 4.8            | 0.4                 | 0.0           | 7.5                   | 2.5              |
|                 | fireplace    | mini fridge      | water cooler   | shower door         | pillar        | ledge                 | furniture        |
| ImGeoNet (ours) | 3.9          | 43.5             | 0.0            | 7.0                 | 0.0           | 1.2                   | 0.0              |
| ImVoxelNet      | 9.6          | 36.1             | 1.7            | 18.3                | 0.0           | 1.0                   | 0.0              |
| VoteNet         | 0.3          | 22.8             | 2.3            | 20.4                | 5.7           | 0.0                   | 0.1              |
|                 | cart         | decoration       | closet door    | vacuum cleaner      | dish rack     | range hood            | projector screen |
| ImGeoNet (ours) | 23.6         | 0.7              | 2.9            | 53.4                | 96.1          | 20.7                  | 0.0              |
| ImVoxelNet      | 18.4         | 0.0              | 0.6            | 16.9                | 84.2          | 14.0                  | 0.0              |
| VoteNet         | 31.2         | 20.0             | 0.3            | 19.1                | 60.8          | 4.0                   | 6.0              |
|                 | divider      | bathroom counter | laundry hamper | bathroom stall door | ceiling light | trash bin             | bathroom cabinet |
| ImGeoNet (ours) | 19.5         | 0.0              | 8.9            | 1.2                 | 0.0           | 18.9                  | 35.8             |
| ImVoxelNet      | 10.0         | 0.8              | 7.9            | 0.0                 | 0.0           | 33.2                  | 37.8             |
| VoteNet         | 33.9         | 1.1              | 15.9           | 64.1                | 3.3           | 55.0                  | 65.9             |
|                 | potted plant | mattress         | <b>mAP</b>     |                     |               |                       |                  |
| ImGeoNet (ours) | 0.0          | 0.0              | <b>17.3</b>    |                     |               |                       |                  |
| ImVoxelNet      | 10.0         | 0.0              | 14.0           |                     |               |                       |                  |
| VoteNet         | 100.0        | 60.4             | 16.0           |                     |               |                       |                  |

Table 6. 3D object detection scores per class on ScanNet200’s tail group (IoU threshold = 0.25).

|                 |                        |                   |                             |              |                    |               |                     |
|-----------------|------------------------|-------------------|-----------------------------|--------------|--------------------|---------------|---------------------|
|                 | paper                  | plate             | soap dispenser              | bucket       | clock              | guitar        | toilet paper holder |
| ImGeoNet (ours) | 3.0                    | 0.0               | 15.8                        | 9.4          | 0.3                | 74.6          | 0.0                 |
| ImVoxelNet      | 0.5                    | 0.0               | 20.3                        | 8.3          | 0.7                | 98.3          | 0.0                 |
| VoteNet         | 0.0                    | 0.0               | 0.1                         | 2.4          | 0.1                | 0.0           | 0.0                 |
|                 | speaker                | cup               | paper towel roll            | bar          | toaster            | ironing board | soap dish           |
| ImGeoNet (ours) | 0.0                    | 0.2               | 26.1                        | 1.7          | 0.0                | 1.7           | 1.2                 |
| ImVoxelNet      | 0.0                    | 0.2               | 23.0                        | 1.8          | 0.0                | 0.0           | 0.0                 |
| VoteNet         | 0.0                    | 0.0               | 0.3                         | 0.2          | 0.0                | 0.1           | 0.0                 |
|                 | toilet paper dispenser | fire extinguisher | ball                        | hat          | shower curtain rod | paper cutter  | tray                |
| ImGeoNet (ours) | 47.3                   | 0.0               | 25.1                        | 0.0          | 0.0                | 59.9          | 1.0                 |
| ImVoxelNet      | 20.5                   | 0.0               | 54.7                        | 0.0          | 0.0                | 51.7          | 0.9                 |
| VoteNet         | 11.3                   | 0.0               | 2.6                         | 0.0          | 0.0                | 0.0           | 0.0                 |
|                 | toaster oven           | mouse             | toilet seat cover dispenser | scale        | tissue box         | light switch  | crate               |
| ImGeoNet (ours) | 1.0                    | 0.0               | 6.4                         | 90.7         | 7.7                | 0.0           | 5.0                 |
| ImVoxelNet      | 17.3                   | 0.0               | 0.0                         | 60.6         | 12.2               | 0.0           | 10.0                |
| VoteNet         | 24.4                   | 0.0               | 6.2                         | 0.0          | 0.0                | 0.0           | 0.3                 |
|                 | power outlet           | sign              | projector                   | plunger      | stuffed animal     | headphones    | broom               |
| ImGeoNet (ours) | 0.0                    | 12.4              | 0.0                         | 0.0          | 0.0                | 0.0           | 0.0                 |
| ImVoxelNet      | 0.0                    | 8.4               | 0.0                         | 0.0          | 0.0                | 0.0           | 0.0                 |
| VoteNet         | 0.0                    | 0.0               | 0.0                         | 0.0          | 0.0                | 0.0           | 0.0                 |
|                 | dustpan                | hair dryer        | water bottle                | handicap bar | vent               | shower floor  | water pitcher       |
| ImGeoNet (ours) | 0.0                    | 0.0               | 0.0                         | 0.0          | 0.0                | 50.0          | 0.0                 |
| ImVoxelNet      | 0.0                    | 0.0               | 0.0                         | 0.0          | 0.0                | 0.0           | 0.0                 |
| VoteNet         | 0.0                    | 0.0               | 0.0                         | 0.0          | 0.0                | 100.0         | 0.0                 |
|                 | bowl                   | paper bag         | laundry detergent           | dumbbell     | tube               | closet rod    | coffee kettle       |
| ImGeoNet (ours) | 8.6                    | 0.2               | 0.0                         | 50.0         | 0.1                | 0.0           | 0.0                 |
| ImVoxelNet      | 2.9                    | 0.0               | 0.0                         | 30.0         | 0.1                | 0.0           | 0.0                 |
| VoteNet         | 0.0                    | 0.7               | 0.0                         | 0.0          | 0.0                | 0.0           | 0.0                 |
|                 | shower head            | keyboard piano    | case of water bottles       | coat rack    | folded chair       | fire alarm    | power strip         |
| ImGeoNet (ours) | 0.0                    | 60.0              | 3.0                         | 0.0          | 0.0                | 0.0           | 0.0                 |
| ImVoxelNet      | 0.0                    | 13.2              | 0.0                         | 0.0          | 0.0                | 0.0           | 0.0                 |
| VoteNet         | 0.0                    | 0.3               | 4.8                         | 11.1         | 1.0                | 0.0           | 0.0                 |
|                 | calendar               | poster            | <b>mAP</b>                  |              |                    |               |                     |
| ImGeoNet (ours) | 0.0                    | 0.0               | <b>9.7</b>                  |              |                    |               |                     |
| ImVoxelNet      | 6.7                    | 2.9               | 7.7                         |              |                    |               |                     |
| VoteNet         | 0.0                    | 0.0               | 2.9                         |              |                    |               |                     |
